# Supplementary material for: Over-expression of an S-domain receptor-like kinase extracellular domain improves panicle architecture and grain yield in rice
Source: PubMed Central journal article supplement (PMC4765790; doi:10.1093/jxb/erv417), 2015-10-01
Supplement: supp_erv417_Supplementary_data.pdf [file supp_erv417_Supplementary_data.pdf]

## Figure legend

**Supplementary Fig. S1. Amino acid sequence alignment of the OsLSK1 homologous proteins.** *LOC\_Os01g47810*, *LOC\_Os01g47820*, *LOC\_Os01g47840*, *OsLSK1* (*LOC\_Os01g47900*), *LOC\_Os01g48000*, *LOC\_Os01g48020*, *LOC\_Os01g48040* and *OsSIK2* are from rice, *ZmPK1* is from maize, *AtRLK1* (*AT5G60900*), *AtARK1* (*AT1G65790*), *AtARK3* (*At4G21380*) and *AtSRK* are from *Arabidopsis*. The black region shows the some amino acids. The grey color indicates relative conservative region.

**Supplementary Fig. S2. The protein structures and genome distribution of OsLSK1 homologous genes.** (A): The conserved domain structure diagram in *OsLSK1* and six homologous. (B): *OsLSK1* cluster with six homologous genes in chromosome 1. The *OsLSK1* was labeled with red circle.

**Supplementary Fig. S3. Phenotype analysis of *OXOsLSK1-f* and *OsLSK1-RNAi* plants.** (A): The panicle morphologies of wild-type, *OXOsLSK1-f* and *OsLSK1-RNAi* transgenic rice. (B): The gross morphologies of wild-type, *OXOsLSK1-f* and *OsLSK1-RNAi* transgenic rice. (C), (E): Comparison of plants height, primary branch number between wild-type and *OXOsLSK1-f* transgenic rice. (D), (F): Comparison of plants height, primary branch number between wild-type and *OsLSK1-RNAi* transgenic rice. Data are shown as means  $\pm$  s.d. (Student's *t* tests, \**P* < 0.05, \*\**P* < 0.01, n=60).

**Supplementary Fig. S4. Quantitative RT-PCR analysis of plant morphologies related genes in *OXOsLSK1-f* plants.** Data are shown as means  $\pm$  s.d. (Student's *t* tests, \*\**P* < 0.01, n=3).

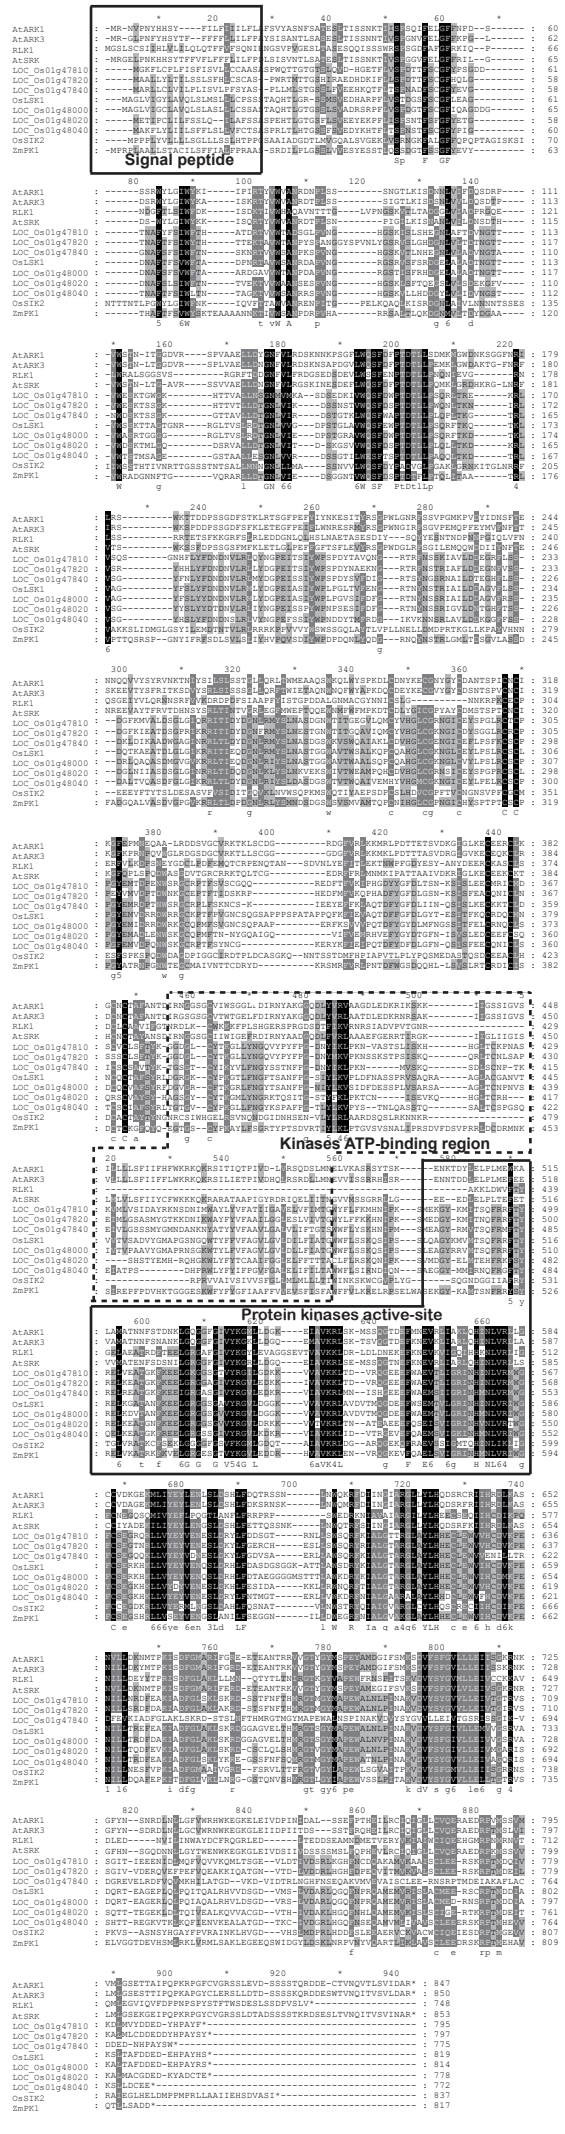

The Extracellular domain

Transmembrane domain

The kinase domain

Figure S1

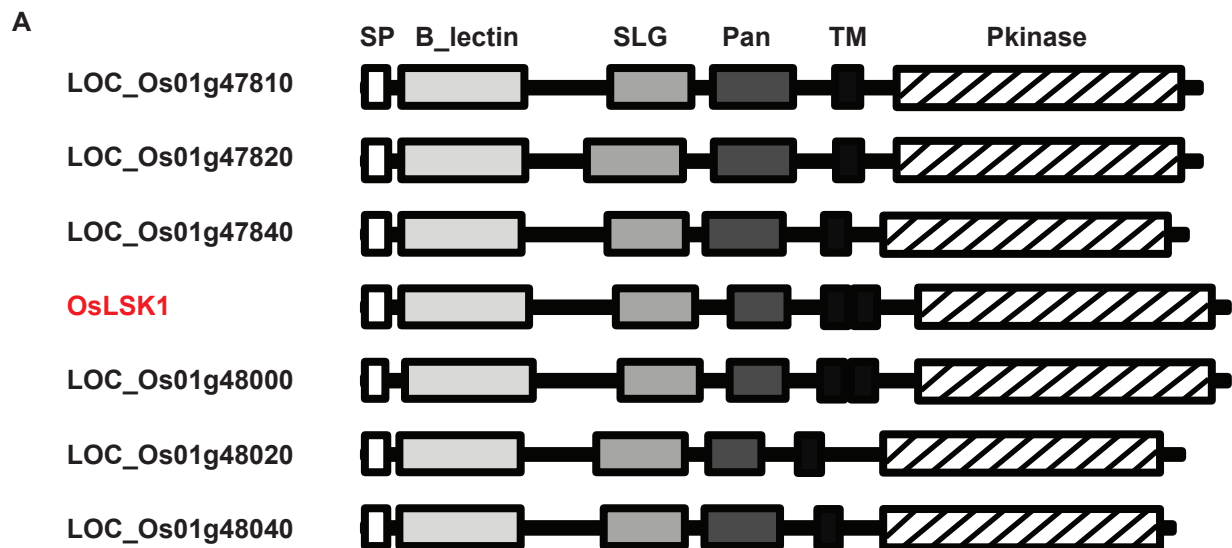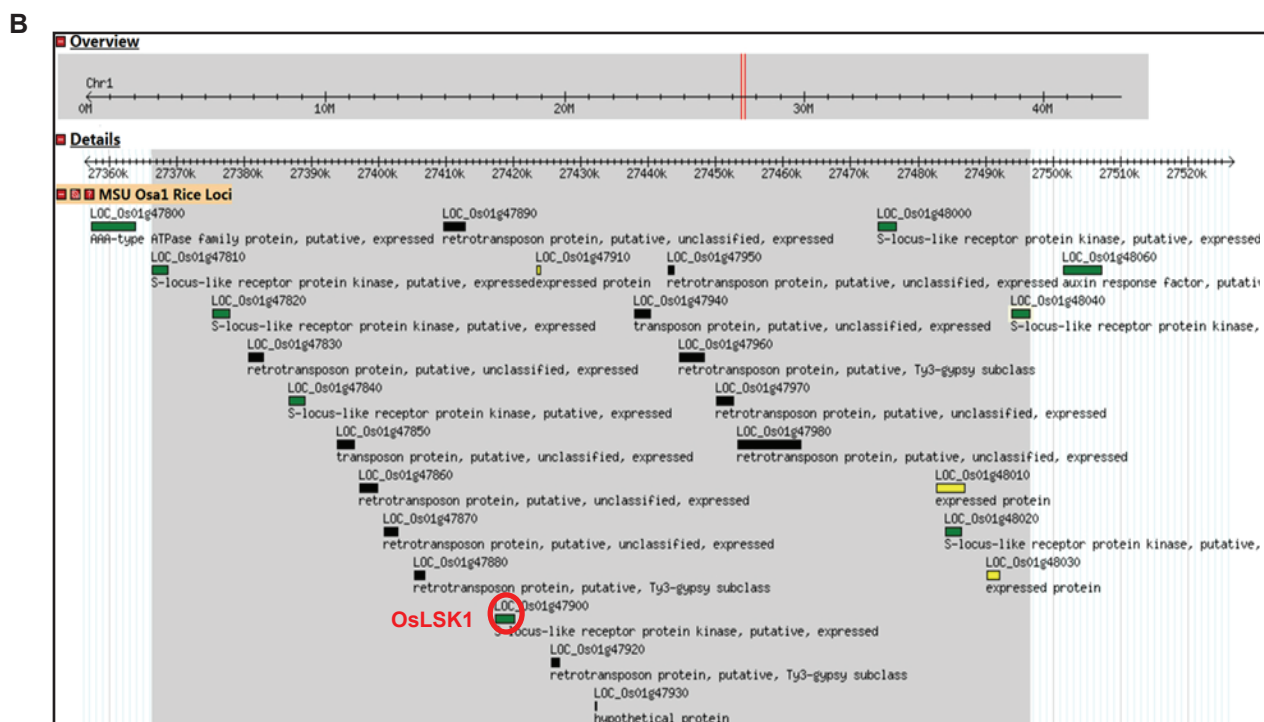

Figure S2

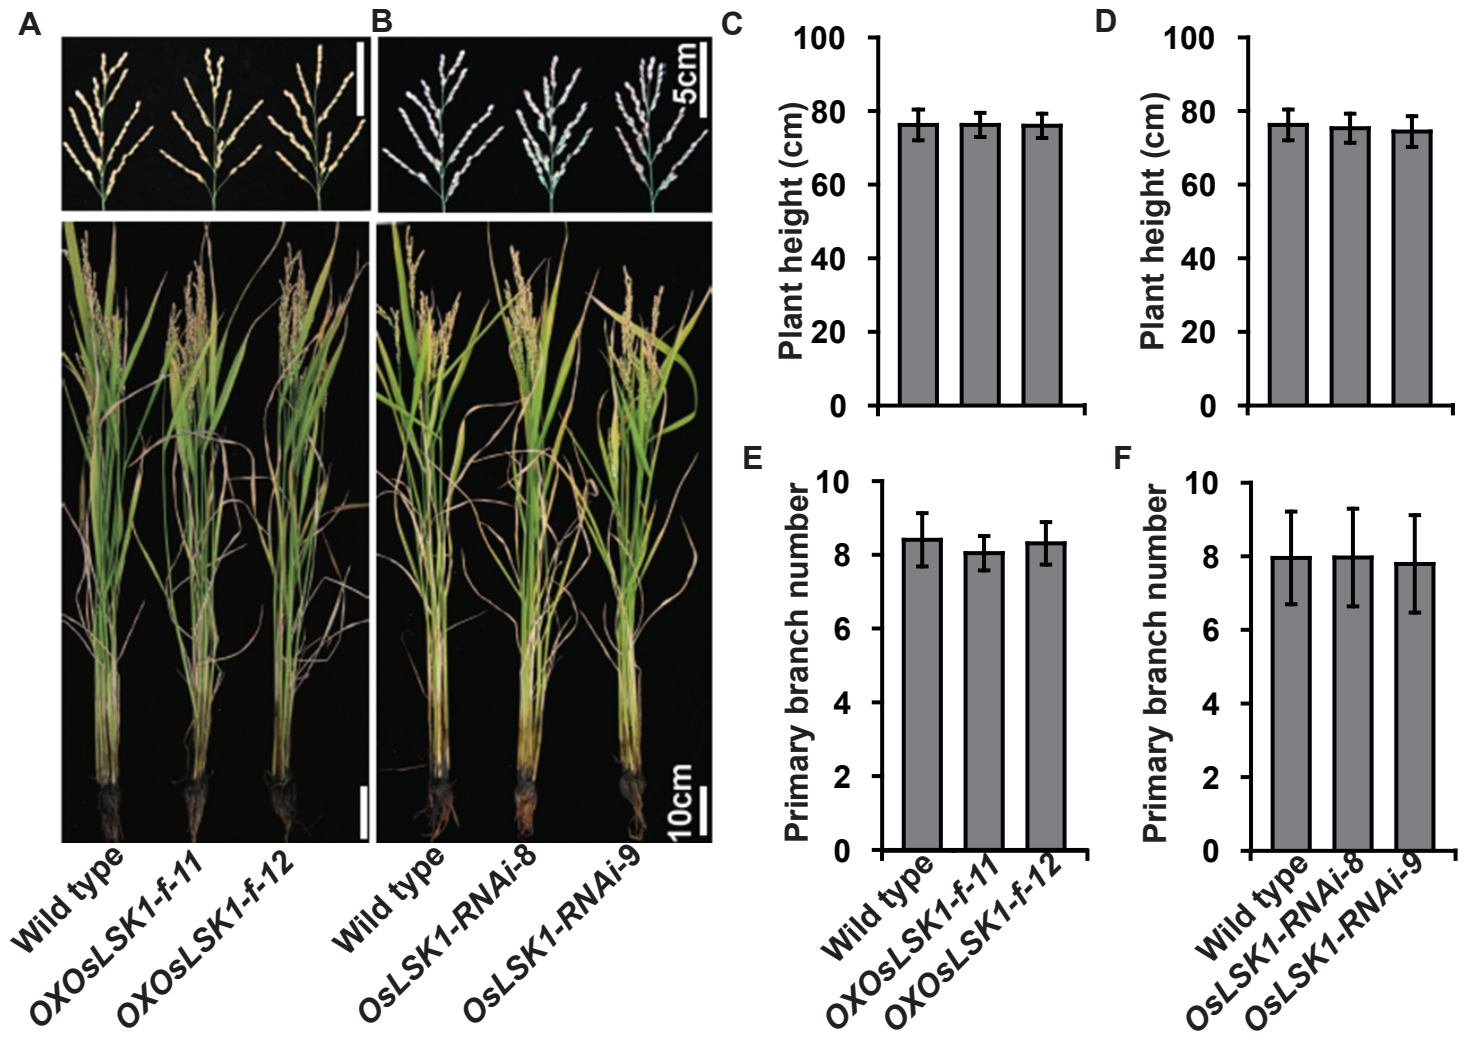

Figure S3

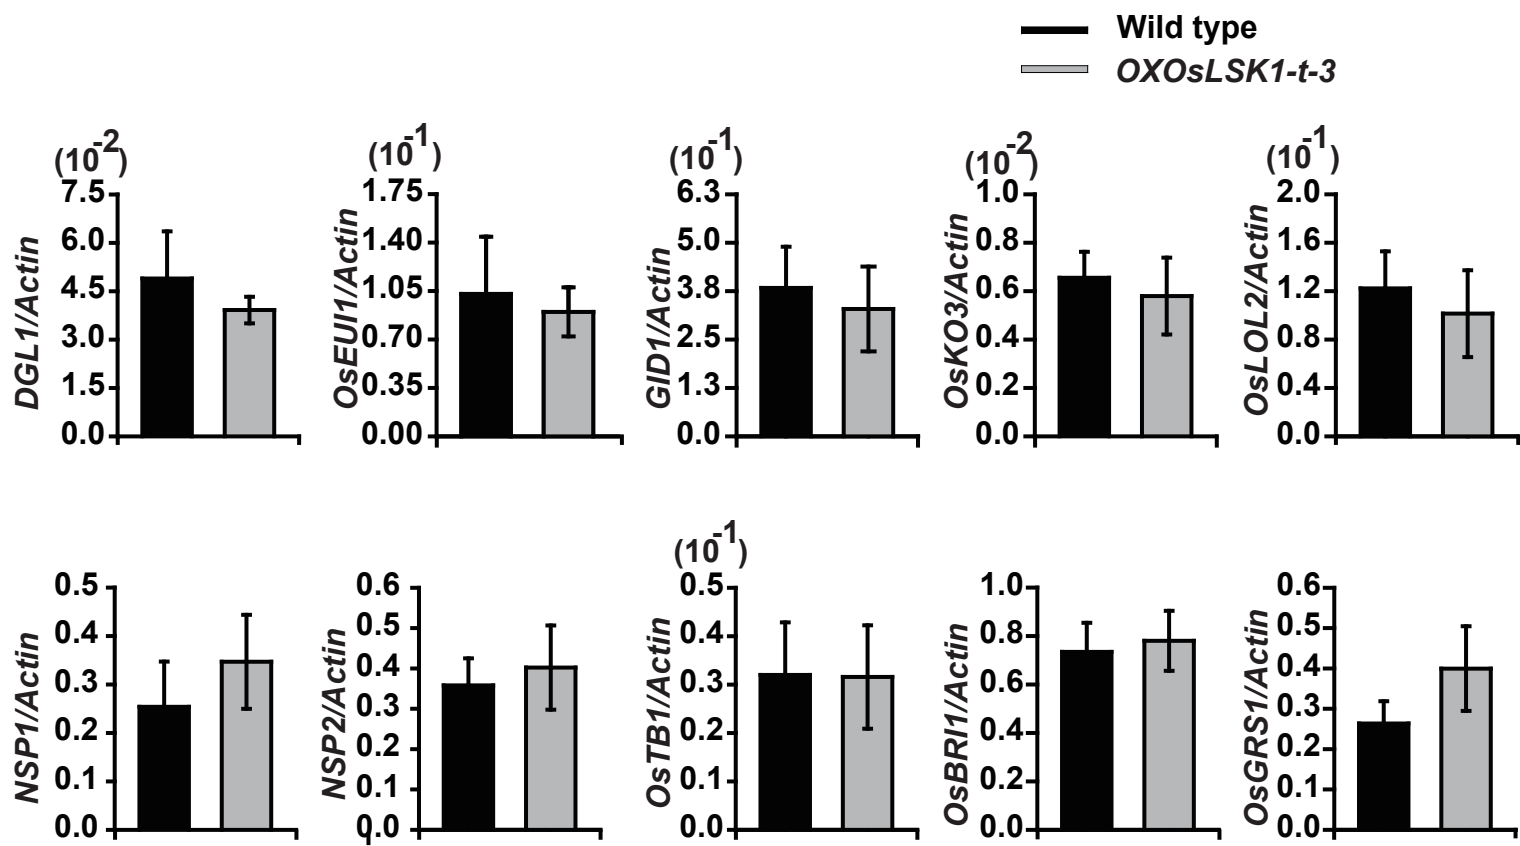

Figure S4

**Table S1 Primers**

|                                          | Gene                             | Forward primer                           | Reverse primer                        |
|------------------------------------------|----------------------------------|------------------------------------------|---------------------------------------|
| Vector construction for transgenic plant | OsLSK1-t                         | CAAAAAAGCAGGCTTCATGGCTGGATTGGTCATCG      | CAAGAAAGCTGGGTCTCGATGAACTTGA ACT      |
|                                          | OsLSK1-f                         | CAAAAAAGCAGGCTTCATGGCTGGATTGGTCATCG<br>G | CAAGAAAGCTGGGT CAGAGTGGTAGGCAGGGTGT T |
|                                          | OsLSK1-GUS                       | TATTTTCGGTACAATGGAGGTCG                  | CGTTTCAACTATAGCAGTTTGGC               |
|                                          | OsLSK1RNAi                       | CAAAAAAGCAGGCTTCGGGGCCTGACCGTCTCCCT      | CAAGAAAGCTGGGT CACGCCGGCGTCGTCGAGGAT  |
| Vector construction for Yeast two-hybrid | LOC_Os01g47810                   | CAAAAAAGCAGGCTTCACAGGTACATCTCTCCAGGT     | CAAGAAAGCTGGGT CATAAACCTGGCCATTGTAG   |
|                                          | LOC_Os01g47820                   | CAAAAAAGCAGGCTTCTCACACATCAGAGCTGAGGA     | CAAGAAAGCTGGGTCTAAGCCTTTAGTGTAAC      |
|                                          | OsLSK1                           | CAAAAAAGCAGGCTTCTGGGCAGATCCTCCATGT       | CAAGAAAGCTGGGT CGAAGCCGTTGAACAGCGT    |
|                                          | LOC_Os01g48000                   | CAAAAAAGCAGGCTTCCAGCACACGCTCGGCACCG      | CAAGAAAGCTGGGT CGTAGCCGTTGAAAAGCCT    |
|                                          | LOC_Os01g48020                   | CAAAAAAGCAGGCTTCTCATTCTTATCGGTAGAAG      | CAAGAAAGCTGGGT CCCGGCCGTTGTAGAGCATA   |
|                                          | LOC_Os01g48040                   | CAAAAAAGCAGGCTTCACCGGCTCATCTTTCTCGG      | CAAGAAAGCTGGGT CACCATTGAACAGGAGGCCT   |
|                                          | attB adaptor                     | GTGGGGACAAGTTTGTACAAAAAAGCAGGCTTC        | GTGGGGACCACTTTGTACAAGAAAGCTGGGTC      |
| Positive transgenic lines test           | OsLSK1-1(for <i>OsLSK1RNAi</i> ) | GGTGCTTACTCCTAATCATCAT                   | GTCATGTGTTGAAAAGTCTA                  |
|                                          | OsLSK1-2(for <i>OsLSK1OX</i> )   | ATGGCTGGATTGGTCAT                        | ACCGACATGGAGGATCT                     |
|                                          | Actin                            | ATCCTTGTATGCTAGCGGTCGA                   | ATCCAACCGGAGGATAGCATG                 |

|       |                |                        |                        |
|-------|----------------|------------------------|------------------------|
| Q-PCR | LOC_Os01g47810 | CATTGACATCGGTAAAAGC    | CATGCCACCGACAGGACGGTG  |
|       | LOC_Os01g47820 | CCTGCAGCTACTGCATAAAT   | TGCAATATAATCATTCCAATG  |
|       | LOC_Os01g48040 | GACACTGATATGTGTGCCTA   | CATATCTATTTGGCGGTGGATG |
|       | LOC_Os01g48000 | ATCACCAGGCTAACCGTTAGCA | TGAAGTCTTAACTACAATTT   |
|       | LOC_Os01g48020 | CACTCATCCAGTACCACCA    | TGGTGGTACTGGATGAGTG    |
|       | OsKO1          | AGATGACCCACATGCTC      | CATCCACATAGACTGAA      |
|       | OsKO2          | TCAGCTGGGTTCCAAAC      | CCACGCACAATCCTTTC      |
|       | GID2           | ATGTCGCAGCCTGCTG       | GCAACCTTCTCCATG        |
|       | OsGA3ox2       | TAGCCGACGAGTTGCTGA     | TACCAGTTGAGGTGC        |
|       | OsKO3          | ATAGAGGCTGCAGATAC      | CAATGAGCTGGAACAGAG     |
|       | GID1           | GTACCTGGACAGGAG        | TAGATGCGCACCTCCA       |
|       | DGL1           | ACCACTGGATGAGTATC      | GTACTAGATTGACCTCG      |
|       | OsGSR1         | AGGTGCTCCAACACGCAG     | TCCTTGGTCTTCCAGTTG     |
|       | OsEUI1         | CAAGCCCAAGTACCTCCAGA   | TGACACGGGCCATGTAGAA    |
|       | OsLOL2         | AGTGTATCTCCAGTACTGG    | CTCCCTGTACGTTACCTCCA   |
|       | Dwarf10        | ACTATGGAACCTCGGC       | ACTCGATCTGCCGGTGC      |
|       | Dwarf14        | TCGCCAAGCTTGTC         | CATCGCGTCGAACAC        |
|       | Dwarf27        | TGTTGCTCGACGGTGAG      | GTCTCCGTCTGCACCG       |
|       | HTD2           | ATGCTGCGATCGACGC       | ACCATCGTCTTCTCCG       |
|       | NSP1           | ACTCCCCTACAACAATAA     | TTGCCGCATTCTTCTAGGT    |
|       | NSP2           | ACACTTGGAGAGTACGAGG    | ATCCAACGCTCCACCCTCAC   |
|       | OsTB1          | ATGGACATACCGCTTT       | GTGGTGGTAGTAGAA        |
|       | OsBRI1         | ATGGTGGGTGGATCTGG      | TCCTTGACCGGCTCGCCT     |
|       | Dwarf1         | ATGGGCTCATCCTGTAGCA    | TGCATGGATAACTGATGTGT   |
|       | Dwarf88        | TGCTGCGATCGACGCAT      | CACCATCGTCTTCTC        |
|       | OsSPY          | ATGGGGCGACCGGGGA       | TCCTTCCCGTCCAACCT      |
|       | OsLRK1         | ATCTCTTGGCAACCTG       | GACGATGAGTTTGCTG       |
|       | Ghd7           | ATGGGGATGGCCAATGAG     | CTGCTGGTCCCATCGACA     |
|       | MOC1           | ATGCATGAGAGTGATG       | ACCACAGCATGCAGAG       |

|                                          |                               |                                              |                                                  |
|------------------------------------------|-------------------------------|----------------------------------------------|--------------------------------------------------|
| Vector<br>construction for<br>BiFC assay | pSPYNE (R)-<br>LOC_Os01g47810 | GCCTACTAGTGGATCCATGGGTAAGTTCCTGTGCC<br>CAC   | TCCTACCCGGGAGCGGTACCAAGAAAGTACCACCCT<br>GTCATG   |
|                                          | pSPYNE (R)-<br>LOC_Os01g47820 | GCCTACTAGTGGATCCATGGCTGCGCTGCTGTATCT<br>AAC  | TCCTACCCGGGAGCGGTACCGGACTTGGGTATGTTA<br>TGCTTC   |
|                                          | pSPYNE (R)-OsLSK1             | GCCTACTAGTGGATCCATGGCTGGATTGGTCATCG<br>GCTAC | TCCTACCCGGGAGCGGTACCCTTGCTGGAGAGGAAC<br>CACCAG   |
|                                          | pSPYNE (R)-<br>LOC_Os01g48000 | GCCTACTAGTGGATCCATGGCTGGATTGGTCATCG<br>GCTG  | TCCTACCCGGGAGCGGTACCGCTCTGCTTGCTGGAC<br>AGGAACCA |
|                                          | pSPYNE (R)-<br>LOC_Os01g48020 | GCCTACTAGTGGATCCATGGAAACAATTCCCTGCCT<br>C    | TCCTACCCGGGAGCGGTACCTGTAGCCTCCTTCAATT<br>CTCTG   |
|                                          | pSPYNE (R)-<br>LOC_Os01g48040 | GCCTACTAGTGGATCCATGGCAAAGTTTCTCTATCT<br>GATC | TCCTACCCGGGAGCGGTACCCCTTATGGAAAGAAAC<br>CACCAAGC |
|                                          | pSPYCE(M)-OsLSK1              | GCCTACTAGTGGATCCATGGCTGGATTGGTCATCG<br>GCTAC | GAGCGGTACCCTCGAGCTTGCTGGAGAGGAACCACC<br>AG       |



**Table S2 Yield traits of transgenic plants.**

|                     | <b>Primary<br/>branches per<br/>panicle</b> | <b>Grains per<br/>primary<br/>branch</b> | <b>Grains per<br/>panicle</b> | <b>1000 Grain<br/>weight (g)</b> | <b>Tillers per<br/>plant</b> | <b>Grains per<br/>plant</b> | <b>Grain weight<br/>per plot (g)</b> | <b>Plant height<br/>(cm)</b> | <b>Seed setting<br/>rate</b> |
|---------------------|---------------------------------------------|------------------------------------------|-------------------------------|----------------------------------|------------------------------|-----------------------------|--------------------------------------|------------------------------|------------------------------|
| <b>Wild type</b>    | 5.48±0.42                                   | 7.33±0.31                                | 40.46±6.88                    | 24.36±0.51                       | 15.12±1.03                   | 611.46±123.64               | 149.83±32.76                         | 72.85±2.17                   | 0.93±0.02                    |
| <b>OXOsLSK1-t-3</b> | 7.50±0.44 **                                | 8.11±0.21 *                              | 60.84±3.20 **                 | 24.63±0.47                       | 16.77±1.86                   | 1049.29±217.26              | 257.82±58.91 **                      | 80.54±2.02 **                | 0.92±0.02                    |
| <b>OXOsLSK1-t-4</b> | 7.33±0.82 **                                | 8.42±0.71 *                              | 61.80±6.47 **                 | 24.11±0.52                       | 15.55±1.17                   | 961.96±163.69               | 233.44±40.93 **                      | 79.77±1.76 **                | 0.92±0.04                    |

Data are shown as means ± s.d.(Student's *t* tests, \* P < 0.05, \*\* P < 0.01, n=60).
